# 1 **Pan-cancer identification of clinically relevant genomic** 2 **subtypes using outcome-weighted integrative clustering**

3 Arshi Arora<sup>1</sup>, Adam B. Olshen<sup>2,3</sup>, Venkatraman E. Seshan<sup>1</sup>, and Ronglai Shen<sup>1</sup>

4 <sup>1</sup>**Department of Epidemiology and Biostatistics, Memorial Sloan Kettering Cancer Center, New**  
5 **York, NY**

6 <sup>2</sup>**Department of Epidemiology and Biostatistics, University of California at San Francisco, CA**

7 <sup>3</sup>**Helen Diller Family Comprehensive Cancer Center, University of California at San Francisco, CA**

8

## 9 **ABSTRACT**

10 Molecular phenotypes of cancer are complex and influenced by a multitude of factors. Conventional  
11 unsupervised clustering of heterogeneous cancer patient populations is inevitably driven by the dominant  
12 variation from major factors such as cell-of-origin or histology. Drawing from ideas in supervised text  
13 classification, we developed survClust, an outcome-weighted clustering algorithm for integrative patient  
14 stratification. We show survClust outperforms unsupervised clustering in identifying cancer patient  
15 subpopulations characterized by specific genomic phenotypes with more aggressive clinical behavior.  
16 The algorithm and tools we developed have direct utility toward clinically relevant patient stratification  
17 based on tumor genomics to inform clinical decision-making.

18

## 19 **KEYWORDS**

20 Integrative Genomics, Supervised Clustering, Cancer Genomics, Statistical Methods, Data Integration

21

## 22 **INTRODUCTION**

23 Cancer is a complex disease with heterogeneous clinical outcomes. Understanding how patients respond  
24 to treatment and what drives disease progression and metastasis is critical for managing and curing the  
25 disease. Linking comprehensive molecular profiling data with patient outcome carries great promise in  
26 addressing such important clinical questions. This requires innovative statistical and computational

27 methods designed for integrative analysis of multidimensional data sets to model intra-tumor and inter-  
28 patient heterogeneity at genomic, epigenetic, and transcriptomic levels. Each of these molecular  
29 dimensions is correlated yet characterize the disease in their own unique way. In order to arrive at a  
30 comprehensive molecular portrait of the tumor, multiple groups have proposed statistical and  
31 computational algorithms to synthesize various channels of information including methods developed by  
32 us (iCluster<sup>1,2</sup>) and others (PARADIGM<sup>3</sup>, CoCA<sup>4</sup>, SNF<sup>5</sup>, CIMLR<sup>6</sup>) to stratify disease populations. However,  
33 the majority of the work has focused on unsupervised clustering, utilizing the molecular data alone.

34  
35         Unsupervised learning does not necessarily lead to unique answers as the data are often  
36 complex and multi-faceted. Consider the problem of clustering a collection of documents in text mining  
37 where multiple structures can be present including authorship, topic, and style. The outcome of the  
38 clustering is likely driven by a mixture of these underlying structures. As a result, there is often no single  
39 “right” answer in unsupervised clustering problems. In most complex data applications, many local optima  
40 exist that poses special challenges in optimization. Xing et al.<sup>7</sup> proposed a weighted distance metric  
41 allowing users to specify what they consider “meaningful” in defining similarity toward a more efficient and  
42 local-optima free clustering performance.

43  
44         Drawing analogy with the text learning problem described above, the molecular profile of a tumor  
45 is influenced by a multitude of factors including tissue-of-origin<sup>8</sup>, histology (e.g., squamous vs.  
46 adenocarcinoma), tumor microenvironment (e.g., immune cell infiltration<sup>9</sup>), dedifferentiation states<sup>10</sup>, and  
47 specific pathway activation<sup>11</sup>. Conventional unsupervised clustering applied to the most variable features  
48 is inevitably driven by the dominant variation from major factors, for example, cell-of-origin<sup>8</sup> or ancestry<sup>12</sup>  
49 (germline variation) in the study cohort. When patient outcome related stratification is of interest, a more  
50 directed clustering approach is needed.

51  
52         We present *survClust*, an outcome-weighted integrative clustering algorithm for survival  
53 stratification based on multi-dimensional omics-profiling data. The algorithm learns a weighted distance  
54 matrix that down-weights molecular features with no relevance to the outcome of interest. This method

55 can be used on individual platforms alone, or by integrating various molecular platforms, to mine  
56 biological information leading to distinct survival subgroups. We analyzed over 6,000 tumors across 18  
57 cancer types. Each disease type was classified by *survClust*, based on six molecular assays – somatic  
58 point mutations, DNA copy number, DNA methylation, mRNA expression, miRNA expression, protein  
59 expression, and the integration of the six assays. The results have revealed novel survival subtypes not  
60 previously identified by unsupervised clustering.

## 61 RESULTS

### 62 The *survClust* model: motivation and method overview

63 The molecular profile of a tumor often harbors information on a multitude of factors including cell lineage,  
64 tumor microenvironment, cell differentiation and other clinical and histopathological features. Some of  
65 these factors are associated with treatment response and/or survival outcome, while others are not. If a  
66 particular patient outcome (e.g., patient survival) is of interest, a more supervised approach is needed.  
67 We demonstrate this using a simulated data example (**Fig. 1a, Supplementary Fig 1**). In this scenario,  
68 we simulated three risk subgroups in a cohort of 300 hypothetical patient samples with distinct survival  
69 hazard rates in each subgroup (a median survival of 4, 3, and 2 years respectively). A set of 15 features  
70 was then simulated from a mixture Gaussian distribution with different means in the three risk subgroups.  
71 Another set of 15 features was simulated in the same way but permuted to disrupt the feature-risk  
72 group association. A third group of 270 features were simulated from Gaussian noise. Figure 1b shows  
73 that an unsupervised clustering using the K-means algorithm failed to identify the survival subtypes in the  
74 context of complex feature variations. To identify outcome-associated clustering solution, *survClust*  
75 utilizes a weighted distance metric:

$$d(\mathbf{a}, \mathbf{b}) = \sqrt{(\mathbf{a} - \mathbf{b})^T \mathbf{W}(\mathbf{a} - \mathbf{b})},$$

76 where  $(\mathbf{a}, \mathbf{b})$  denote a pair of sample vectors measured for  $p$  features, and  $\mathbf{W}$  is a diagonal weight matrix  
77 over  $p$  features with  $\mathbf{W} = \text{diag}\{w_1, \dots, w_p\}$ . The weights  $w_p$ 's are obtained by fitting a univariate cox  
78 proportional hazards model for each feature in the training data with repeated training-test sample splits  
79 for cross-validation (see more details in the Methods Section). Figure 1c shows that *survClust* was able to  
80 identify the true risk groups with 97.15% accuracy [95% CI = 94% - 100%], whereas the accuracy from an

81 unsupervised clustering was 67.50% without reducing the effect of the survival unrelated and noise  
82 features.

83 Our algorithm allows the integration of multiple data modalities. Given  $m$  data types measured  
84 over respective feature space (**Fig. 1d**), the algorithm learns a weighted distance matrix from each  
85 molecular data type incorporating a vector of Cox regression hazard ratio as weights. Each feature is  
86 weighed and a pairwise distance matrix is calculated (we refer to this step as **getDist**). This step reduces  
87 the computation space considerably by transforming the problem from sample by feature to sample by  
88 sample. Note that, different sample sizes across data types are allowed, i.e., a sample can be measured  
89 for some but not all platforms. Next, the weighted pairwise distance matrices are integrated by summing  
90 over weighted  $m$  data types (**combineDist**), which retains all samples with at least one data type  
91 available, with complete pairwise information. **survClust** then projects the integrated and weighted  
92 distance matrix into a lower dimensional space via multidimensional scaling (MDS) and then clusters  
93 sample points into subgroups via the K-means algorithm. More details can be found in the Methods  
94 Section.

95

### 96 ***survClust* is more powerful than unsupervised clustering in identifying clinically relevant** 97 **molecular subtypes**

98 We applied *survClust* to the TCGA data set including 6,209 tumor samples in 18 cancer types to identify  
99 survival outcome-associated subtypes defined by somatic mutation, DNA copy number, DNA methylation,  
100 mRNA expression, and protein expression, individually and integratively. A summary of the sample sizes  
101 and feature space is included in Supplementary Table 1. Supplementary Table 2 compares the survival  
102 association (log-rank statistic) for the *survClust* integrated subtypes versus those derived from  
103 unsupervised clustering methods commonly used in TCGA studies including COCA and iCluster. The log-  
104 rank statistic compares estimates of the hazard functions of each subgroup comparing to the expected  
105 values under the null hypothesis (all subgroups have identical hazard functions). Larger log-rank statistic  
106 suggests stronger evidence of survival association. By differentially weighting the molecular features by  
107 the corresponding survival association in constructing the distance matrix, we show that *survClust* is more  
108 powerful in identifying subtypes that are directly relevant to stratify the outcome of interest, leading to



109 substantially more distinct survival subgroups than those existing molecular subclasses obtained by  
110 unsupervised clustering. To further demonstrate, we highlight the *survClust* analysis of low-grade glioma  
111 and kidney papillary renal cell carcinoma below.

112  
113 ***survClust* identifies a poor prognostic *IDH*-mutant low-grade glioma subgroup.** Low Grade Gliomas  
114 (LGG) have a unique molecular footprint, characterized by *IDH1/2* mutation status and co-deletion in  
115 chromosome 1p and 19q regions of the genome<sup>13</sup>. As shown previously, mutations in *IDH1* and *IDH2*  
116 genes are present in a majority of the low-grade gliomas and define a subtype associated with favorable  
117 prognosis<sup>14</sup>. *IDH*-mutant tumors with chromosome 1p and 19q codeletion (*IDH*mut-codel) exhibit the most  
118 prolonged survival times followed by *IDH*-mutant tumors without the codeletion (*IDH*mut-non-codel), with  
119 *IDH*-wt tumors demonstrating more aggressive clinical behavior. We performed *survClust* on 6 available  
120 molecular platforms (somatic mutation, DNA copy number, DNA methylation, mRNA expression, and  
121 protein expression) in 512 LGG samples as profiled by the TCGA. The optimal number of clusters *k* was  
122 chosen by assessing *survClust* fits over log-rank test statistics and standardized pooled within-cluster  
123 sum-of-squares in cross-validation (see Methods Section). Cross-validation was performed to ensure  
124 unbiased estimation of survival association and to avoid over-fitting.

125  
126 The integrated *survClust* solution for LGG was optimized at *k*=5, with the *IDH*-mutant-codel (*c*3)  
127 and *IDH*-mutant-non-codel (*c*1) subtypes associated with good prognosis as expected (**Fig 2a**). By  
128 contrast, the *IDH*-wt subclass (*c*5) showed association with poor survival, enriched for mutations in *EGFR*  
129 and *PTEN* gene and concurrent chromosome 7 gain and 10 loss, resembling glioblastomas. Interestingly,  
130 *survClust* identified a small *IDH*-mutant subtype characterized by *CDKN2A* deletion (*c*4), which showed  
131 markedly worse survival among the *IDH*-mutant tumors, similar to the *IDH*-wt group (*c*5) that tends to  
132 behave far more aggressively with prognosis similar to glioblastomas. In addition, a copy number quiet  
133 subgroup (*c*2) was identified, showing high expression of mir-1307 and mir-29c (**Supplementary Fig 3**).  
134 These results highlight the strength of *survClust* in identifying clinically relevant molecular stratifications  
135 and the potential to refine the existing paradigm in glioma subtyping to inform clinical decision-making.

136

137 ***survClust* identifies prognostic subtypes of kidney papillary renal-cell carcinoma (KIRP).** Three  
138 survival distinct subtypes were identified using *survClust* integrating DNA copy number, mRNA  
139 expression, DNA methylation, miRNA and protein expression assay profiled in 289 tumor samples. The  
140 c3 subtype was associated with poor survival (median survival time = 1.63 yrs) (**Fig 2b**), associated with  
141 younger age (median age 57 yrs) and more female gender (55%). The defining genomic characteristics  
142 include *CDKN2A* loss, arm-level gains in multiple chromosomes including 7, 12, 15 and 17 as described  
143 previously<sup>15</sup>.

144

#### 145 ***survClust* identifies clinically relevant mutational subgroups across cancer types**

146 *survClust* is a flexible framework and can be applied to individual data types for patient stratification. For  
147 example, somatic mutation based stratification is often of interest in a clinical sequencing setting. To  
148 illustrate that, we applied *survClust* to mutation data alone using a hazard ratio weighted binary distance-  
149 based clustering. A *circomap* plot was created to facilitate annotation and visualization of the results  
150 across cancer types (**Fig 3a**). *survClust* identified high TMB subgroups in nearly all cancer types included  
151 in this analysis. Correlating mutational signatures<sup>16</sup> with these subtypes in the *circomap* plot further  
152 revealed etiology underlying these hypermutated tumors. The smoking signature tracks lung cancer  
153 (LUSC and LUAD) and the subset of head and neck cancer (HNSC) with elevated TMB. The DNA  
154 mismatch repair (MMR) signature tracks high TMB subgroups in stomach (STAD), endometrial cancer  
155 (UCEC), and colon cancer (COAD). The APOBEC signature is prevalent in bladder (BLCA) and cervical  
156 cancers (CESC). Finally, the aristolochic acid signature (signature 22) is enriched in a liver cancer  
157 subgroup identified by *survClust* (**Supplementary Fig 4e**), which is consistent with aristolochic acid and  
158 their derivatives being implicated in liver cancers in Asian populations<sup>17</sup>.

159

160 In endometrial cancer, *survClust* confirmed a previously known ultra-high mutated subtype  
161 associated with the POLE mutation signature (c2) and a hypermutated microsatellite instability (MSI) (c4)  
162 subtype<sup>18</sup> (**Fig 3b**). The *panelmap* in Figure 3b (middle panel) shows that c4 correlated well with clinical  
163 MSI status ( $P < 0.001$ ) and predominantly carried mutants in *ARID1A*, *PIK3CA* and *PTEN* genes. The c1  
164 subtype, consisting of primarily high-grade serious tumors, was associated with worse outcome with a 5-

165 year survival of 58% compared to 95%, 84%, and 83% for c2 (POLE), c3, and c4 (MMR) respectively,  
166 and characterized by higher frequency of mutations in *TP53*, *PPP2R1A* genes, low TMB and older  
167 patients with serous endometrial tumors (60%). The c3 subtype was characterized by higher frequency of  
168 *CTNNB1* mutants. Immune cell decomposition data derived using the CIBERSORT<sup>19</sup> algorithm was also  
169 correlated with the subgroups. Interestingly, high expression of CD8 T-cell immune marker was observed  
170 in the POLE (c2) and MSI (c4) subtype ( $P < 0.001$ ) (**Fig 3b**).

171  
172 *survClust* stratified the bladder cancer cohort into 3 TMB subgroups – with high (c1), intermediate  
173 (c3) and low (c2) mutation burden. The c1 subtype was associated with good outcome, high TMB, high  
174 neoantigen load, high APOBEC load, and high expression of the CD8 T-Cell immune marker ( $P=0.002$ )  
175 (**Fig 3c**). The c3 subtype showed intermediate TMB and APOBEC load with a median survival time of  
176 3.48 yrs. Patients with a low TMB and low APOBEC load performed the worst in terms of survival with a  
177 median survival time of 1.91 yrs.

178  
179 A similar pattern emerged when *survClust* was run on colorectal cancer mutation data classifying  
180 the disease population into three clusters – two low TMB groups and a MMR-associated high TMB group  
181 (c1) (**Supplementary Fig 4b**). c1 was also associated with CD8 T-cell infiltration ( $P = 0.004$ ) and showed  
182 concordance with MLH1 silencing status. A similar subdivision of low TMB group by *TP53* mutation status  
183 was seen where c3 carried *TP53* mutant samples unlike c2. Correlation with histology revealed significant  
184 enrichment of mucinous adenocarcinoma subtype in c1 and c2 (c1,  $n=20$ , 29%; c2,  $n=24$ , 20%)  
185 compared to c3 ( $n=9$ , 5%). In addition to the hypermutated subtypes of endometrial, bladder and  
186 colorectal cancers, we also observed high TMB subgroups with concurrently high expression of CD8 T-  
187 cell markers in cervical cancer c1 subtype (**Supplementary Fig 4a and 5a**), head and neck cancer c4  
188 subtype (**Supplementary Fig 4c, 5c**), lung adenocarcinoma c3 subtype (**Supplementary Fig 4f and 5f**),  
189 lung squamous cell carcinoma c4 subtype (**Supplementary Fig 4g and 5g**) and stomach cancer c1  
190 subtype (**Supplementary Fig 4h and 5h**). There are prior observations that high mutational burden is  
191 associated with increased neo-antigen load and activated T-cell infiltration in lung cancer<sup>20</sup>. Our analysis  
192 revealed that such association may be more widely present in multiple cancer types.

193  
194 ***survClust* identifies distinct copy number subtypes associated with clinical features across**  
195 **cancer types**

196 To identify copy number alterations that define clinically relevant subtypes, segmented data of 18 cancer  
197 types was processed via the CBS algorithm<sup>21</sup> and analyzed with *survClust*. Subtypes characterized by  
198 different degrees in the Fraction of Genome Altered (FGA) emerged in various cancer types (**Fig 4**).  
199 Interestingly, low FGA was associated with better survival in several cancer types including colon, head  
200 and neck, lung adenocarcinoma, soft tissue sarcoma and endometrial cancer (**Supplementary Fig 6 and**  
201 **7**).

202  
203 The *circomap* plot in Figure 4a also revealed association of subtypes with high-level amplification  
204 of major cancer genes including *CCND1* amplification in head and neck cancer (c3), *CCNE1* (c5) and  
205 *AKT2*(c6) amplification in ovarian cancer, and *MDM2* amplification (c4) in sarcoma (**Supplementary Fig**  
206 **6**). Notably, amplification of 19q13.2 region in ovarian cancer c6 subtype harboring the *AKT2* gene is  
207 associated with poor survival (**Supplementary Fig 7f, Supplementary Table 8**) which was consistent  
208 with previous findings that *AKT2* amplification is associated with ovarian cancer aggressiveness<sup>22</sup>.  
209 *CCND1* amplified subtype of head and neck cancer (c3) was also associated with poor survival  
210 (**Supplementary Fig 7b**). Amplification in the *MYC* gene is broadly present in multiple cancer types (**Fig**  
211 **3a circomap**). Among cancer gene deletions, *CDKN2A* loss was observed to define multiple subgroups  
212 associated with poor survival including papillary kidney cancer (c1), low-grade glioma (c4), lung  
213 adenocarcinoma (c4), and soft tissue sarcoma (c1) (**Supplementary Fig 6 and 7**).

214  
215 Colorectal cancer was classified into three varying FGA subtypes with prognostic implications. c1  
216 had low FGA and, c2 and c3 carried heavy genome alterations (**Supplementary Fig 6a**). Even though c1  
217 and c2 had dissimilar FGA, they performed similar in terms of survival as compared to c3, which had poor  
218 outcome with median survival time of 4.5 yrs. (**Supplementary Fig 7a**). Gain in the *MYC* gene was seen  
219 throughout the cancer type and c2 was uniquely characterized by loss of the chromosome 20 p-arm,  
220 which harbors the hsa-mir-103-2 previously reported to be downregulated in colorectal tumors<sup>23,24</sup>.

221  
222 *survClust* is designed to capture the contribution of survival associated molecular features and  
223 reduce the influence from those that are not related to the outcome of interest. Figure 4b provides another  
224 example that this approach is better in identifying prognostically relevant subtypes compared to the  
225 unsupervised clustering approach applied in the original study<sup>25</sup>. *survClust* identified 6 unique CN groups  
226 in liver cancer, with significant survival differences among subgroups. The c5 subtype was characterized  
227 by high FGA and associated with poor outcome with a median survival time of 0.77 yrs. This cluster was  
228 distinguished by a loss of chromosome 15. The c2 subtype was associated with the lowest FGA and a  
229 median survival time of 6.81 yrs. The c4 subtype was enriched for *CDKN2A* deletion with a median  
230 survival time of 2.15 years. By contrast, unsupervised clustering generated subgroups with distinct  
231 molecular differences but did not show any separation in terms of survival.

232  
233 **Integration of multiple data types enhances the identification of survival distinct subgroups**  
234 Figure 5 shows that the integrated *survClust* solution outperformed individual platforms based on the  
235 cross validated log rank statistics for multiple cancer types including cervical cancer, head and neck  
236 cancer, papillary kidney cancer, lower grade glioma, liver and endometrial cancers. In general, the  
237 integrated solutions always emerge at or near the top in performance as compared to the individual  
238 platform specific solutions.

239  
240 Next, we used the adjusted Rand index (RI) to evaluate the concordance between different  
241 solutions. RI is calculated as the proportion of sample pairs that are assigned together in the same cluster  
242 in one solution versus another, adjusted for what is expected by random chance. It provides an indirect  
243 measure of how much a particular data type contributes to the integrated solution. A non-zero adjusted RI  
244 across solutions would suggest shared biology across assay types in some tumors. For example, the  
245 mutation subtypes of endometrial cancer (**Fig 5h**) have the highest adjusted RI (0.56) as compared to  
246 the integrated solution, which is consistent with the fact that *POLE* and *MSI* are the two major prognostic  
247 subtypes that are predominantly defined through mutation burden (**Fig 3b**). Nevertheless, the integrated  
248 solution also clearly shows that there is additional information in DNA methylation, DNA copy number,

249 and mRNA expression being effectively incorporated by *survClust* that improved the survival stratification.  
250 In bladder cancer, the integrated solution is most concordant with the mRNA cluster solution (adjusted RI  
251 = 0.39), indicating influence by mRNA features towards integration (**Fig 5a**). Classification by mutation  
252 data type seemed to have little or no overlap between other assays (adjusted RI close to 0), although the  
253 integrated solution retained some information. (adjusted RI=0.03).

254  
255 The integrated solution classified cervical cancer samples better than rest of the platforms and  
256 pointed towards a 5-cluster solution (**Fig 5b**). Interestingly, a high degree of heterogeneity among  
257 different platforms was observed as represented by a small adjusted RI across the board. The head and  
258 neck cancer integrated solution showed great improvement over individual platforms for  $k > 2$  solutions.  
259 The  $k=4$  integrated solution clearly resulted from effective integration of multiple data types including DNA  
260 methylation, DNA copy number, and mRNA expression with an adjusted RI of 0.33, 0.26 and 0.25  
261 respectively (**Fig 5c**). In this case, RPPA provided very little information toward the integrated solution.

262  
263 The integrated *survClust* analysis stratified papillary kidney cancer type into 3 groups, with CN  
264 sharing maximum information with the integrated solution (adjusted RI = 0.32), followed by mRNA (0.31),  
265 miRNA (0.24), RPPA (0.23), and Methylation (0.19). Lower grade glioma displayed a wide range of  
266 variability among platform type in terms of the logrank statistic (logrank statistic, x-axis from 0-250). The  
267  $k=5$  integrated solution performed the best among the 6 platforms with larger contributions from mRNA  
268 (RI = 0.63), copy number (RI = 0.62) and mutation (RI = 0.57) (**Fig 5e**). The integrated solution of liver  
269 cancer did not show much improvement over individual assay types. Note that we did not use protein  
270 data while integrating as more than half of the samples were not assayed with the protein platform  
271 (RPPA,  $n=182$ ; integrated  $n=371$ ). miRNA, mRNA and copy number showed high median logrank  
272 statistics over rounds of cross-validation demonstrating their role as potential prognostic classifiers.

273  
274 **DISCUSSION**  
275 We proposed a supervised clustering algorithm, *survClust*, that directly incorporates time to event (e.g.,  
276 death, disease progression) information with molecular features to stratify patients into clinically relevant

277 subtypes. We further developed two visualization tools, *circomap* and *panelmap* for displaying and  
278 annotating the resulting stratification. As more clinically annotated genomic data is becomes available as  
279 a result of clinical sequencing programs<sup>26,27</sup>, our method will provide a useful tool to facilitate patient  
280 stratification for clinical decision making. In this study, we analyzed 18 cancer types in ~ 6200 tumors.  
281 Each disease type was classified by *survClust* based on six molecular assays – somatic point mutation,  
282 DNA copy number, DNA methylation, mRNA expression, miRNA expression, protein expression and  
283 integration of the aforementioned six assays.

284  
285 The supervised clustering approach provides a more direct way to identify survival associated  
286 molecular subclasses, often leading to substantially more distinct survival subgroups than those existing  
287 molecular subclasses obtained by unsupervised clustering. For example. The integrated *survClust*  
288 stratification of the hepatocellular carcinomas (LIHC) was associated with a survival log-rank statistic of  
289 45.19 (P<0.001) versus 1.69 (P=0.42) under the unsupervised clustering solution (**Supplementary Table**  
290 **2, Supplementary Fig 8**), suggesting that *survClust* is a more powerful approach for identifying outcome-  
291 associated subtypes. Supplementary Tables 2-7 show comparisons of the log-rank statistics in survival  
292 differences across the various integrated and individual platform *survClust* solutions with those from  
293 existing molecular clustering solutions reported in the TCGA publications (wherever available). Note that  
294 *survClust* solutions have all been cross-validated to avoid overfitting.

295  
296 The outcome-weighted learning framework we propose in this study can be extended to model  
297 binary outcome types such as treatment response or toxicity (which is an important outcome category in  
298 immunotherapy settings). In addition, the integration framework can facilitate the inclusion of other data  
299 modalities including histopathological data and radiological images.

300

## 301 **METHODS**

### 302 ***survClust* workflow**

303 Let  $X_m$  be the  $m^{th}$  ( $m=1, \dots, M$ ) data type of dimension  $N_m$  (number of samples in  $m^{th}$  data type, can vary)  
304 by  $p_m$  (number of features). Data types may consist of continuous (gene expression, copy number log-

305 ratio, DNA methylation, miRNA, protein expression) or binary (mutation status) data. Overall survival is  
306 defined as time from diagnosis to death or last follow-up. The data needs to be pre-processed as  
307 described in **Supplementary Information**.

308 For a pair of two samples  $a$  and  $b$ , **the weighted distance**<sup>7</sup> is calculated as follows:

$$309 \quad d_w(\mathbf{a}, \mathbf{b}) = \sqrt{(\mathbf{a} - \mathbf{b})^T \mathbf{W} (\mathbf{a} - \mathbf{b})}, \quad (1)$$

310 where,  $\mathbf{a}$  and  $\mathbf{b}$  are feature vectors of length  $p$  for samples  $a$  and  $b$  respectively,  $\mathbf{W}$  is a  $p \times p$  diagonal  
311 weight matrix with  $\mathbf{W} = \text{diag} \{w_1, \dots, w_p\}$ . Samples are close to each other when the value of  $d_w$  is small  
312 and dissimilar when  $d_w$  is large.

313  
314 The weights  $w_j$  ( $j = 1, \dots, p$ ) are obtained by fitting a univariate cox proportional hazards model for each  
315 feature:

$$h(t|\mathbf{x}_p) = h_0 \times \exp(\mathbf{x}_j^T * \beta), \quad (2)$$

316 where  $t$  represents the survival time,  $\mathbf{x}_j$  is the  $j^{\text{th}}$  column of matrix  $X$  of length  $N$ ,  $h_0$  is the baseline hazard  
317 function,  $\beta$  is the regression coefficient and  $\exp(\beta)$  is the Hazard Ratio (HR).

318  
319 We consider the absolute value of HR on the logarithmic scale as the weight  $w$ . An HR=1  
320 corresponds to the null that the feature is not associated with survival. This is reflected in a  $\log(1) = 0$   
321 weighting in the distance matrix. Since  $\mathbf{W}$  is a diagonal matrix with diagonal element  $w_j$  ( $j = 1, \dots, p$ ), we  
322 can simply use euclidean distance for computing distances if we transform the data as follows:

$$\mathbf{X}' = \mathbf{X} * \mathbf{W}^{\frac{1}{2}}, \quad (3)$$

323  
324 Euclidean distances are sensitive to scale of the observations. After incorporating weights, we  
325 standardize the data by its grand total:

$$326 \quad \frac{\mathbf{X}'}{\sum_i \sum_j x_{ij}'},$$

327



328 where,  $\sum_i \sum_j x_{ij}'$  is the grand total of weighted matrix  $X'$ , with  $i$  rows (N samples) and  $j$  columns (p  
329 features). Then, one can compute the pairwise distance between samples  $a$  ( $i = 1$ ) and  $b$  ( $i = 2$ ) as:

330 
$$d_w(\mathbf{a}', \mathbf{b}') = d_w(\mathbf{b}', \mathbf{a}') = \sqrt{\sum_{j=1}^p (a_j' - b_j')^2}.$$

331  
332 Conversely, a weighted distance matrix  $\mathbf{D}$  is calculated for all pairwise samples across  $M$  data types. All  
333 samples having full survival information are kept, and the union of all samples ( $N_{union}$ ) across  $M$  data  
334 types is utilized when analyzing a wide number of samples. Non-overlapping samples in data types are  
335 added as *NA* to have a uniform set of  $N_{union}$  samples.

336  
337 The integrated weighted distance matrix is calculated by averaging over the weighted distance  
338 matrices:

$$\mathbf{I}_w = \sum_{m=1}^M \gamma_m \mathbf{D}_m, \quad (4)$$

339 where  $\gamma_m = \frac{1}{M} \forall m$ . The integrated weighted matrix  $\mathbf{I}_w$ , averages the inter- and intra-sample similarity  
340 profiles over the  $M$  data types.  $\mathbf{I}_w$  is then processed by *survClust* via classical multidimensional scaling  
341 (MDS)<sup>28</sup> and clustered using k-means<sup>29</sup>. Classical MDS assumes Euclidean distances; however, in cases  
342 of non-Euclidean distances, Mardia et al<sup>30</sup> provided a method to obtain the resulting positive semidefinite  
343 scalar product matrix. Note that  $\mathbf{I}_w$  follows the Euclidean norm and hence can be represented in  
344  $n - 1$  dimensions. The strong assumption of the Euclidean norm is also important for k-means, as it is  
345 essentially trying to assign samples to the closest centroid or calculating the sum of squared deviations  
346 from centroids.

347  
348 ***Weighted distance metric for mutation data***

349 Somatic mutation data is represented as a binary data matrix where each entry is coded as 1 if the  $j^{\text{th}}$   
350 gene is mutated in the  $i^{\text{th}}$  sample, and 0 otherwise. A challenge with the mutation data matrix is the  
351 sparsity. It is known that somatic mutation data exhibit a long-tailed distribution in which a relatively small  
352 number of variants appear in tumors frequently while the vast majority of variants occur extremely

353 infrequently. We consider genes that are mutated in > 1% of the sample. After incorporating weights, this  
354 data is no longer binary, but it still remains sparse. Due to such data sparsity, computing Euclidean  
355 distance is not appropriate and may lead to inflated distance measures<sup>31</sup>. To combat this problem, we  
356 propose a weighted binary distance metric for such a scenario as described below.

357 Let  $X'_{mut}$  be the weighted mutation data matrix (see Equation. 3) of dimension  $N$  (samples) by  $p$   
358 (genes). Then, the pairwise distance between sample vectors  $\mathbf{a}$  and  $\mathbf{b}$  is calculated as follows:

359

$$d_w(\mathbf{a}, \mathbf{b}) = d_w(\mathbf{b}, \mathbf{a}) = \frac{w_{01} + w_{10}}{w_{01} + w_{10} + w_{11}},$$

360 where

361  $w_{01}$  = sum of weights of  $p$  features that are zero in sample vector  $\mathbf{a}$  but non-zero in sample vector  $\mathbf{b}$ ;

362  $w_{10}$  = sum of weights of  $p$  features that are non-zero in sample vector  $\mathbf{a}$  but zero in sample vector  $\mathbf{b}$ ;

363  $w_{11}$  = sum of weights of  $p$  features that are non-zero in sample vector  $\mathbf{a}$  and non-zero in sample vector  $\mathbf{b}$ .

364

365 Note that,  $d_w(\mathbf{a}, \mathbf{b})$  is a proportion of sum of effect sizes in which only one is non-zero amongst those in  
366 which at least one is non-zero.<sup>32</sup>

367

### 368 **Cross-validation**

369 *survClust* classifies sample populations by incorporating outcome information. Resulting clusters are  
370 overly optimistic and need to be cross validated to arrive at more generalizable solutions. The  
371 *cv.survclust* function provides cross validation for the desired number of folds and outputs cross-validated  
372 solution labels. In the results shown above, we performed 5-fold cross validation as follows: (1) Split the  
373 data into 5 random partitions, label 4 of them as the training sets and the remaining one as the test set.  
374 (2) The weighted distance matrix was calculated from the training data set alone (Eq.1). *survClust*  
375 clustering was performed to arrive at outcome weighted labels in the training set. (3) test labels were  
376 predicted according to training labels (4) Step 2 was repeated until predictions were made on all 5 test  
377 data sets across all 5 folds. (6) clusters were tracked by *centroid relabeling* (**Supplementary Note 1.3**)  
378 across folds, and we obtained outcome weighted class labels for our entire dataset. This concluded one

379 round of cross-validation. All results shown here are results from cross-validated labels across 50 rounds  
380 of cross-validation. Cluster meaning was preserved across rounds of cross validation via a similar  
381 approach to centroid relabeling. The final label for a sample was assigned to a class to which it was  
382 predicted in the maximum number of rounds. This is achieved by another function called  
383 *consensus.summary*.

384

### 385 **Choice of the number of clusters $k$**

386 The logrank test statistic and standardized pooled within-cluster sum of squares were calculated from  
387 cross-validated labels to choose an appropriate  $k$ .

388

### 389 **Logrank test statistic**

390 For a particular  $k$  cluster solution we have  $k$  cross-validated labels. Each class is distinct in survival and  
391 we can compare the difference between classes using the logrank test statistic as follows<sup>33</sup>:

$$\chi^2 = \frac{\sum_k (O_k - E_k)}{\sqrt{V}},$$

392 where,  $O_k$  = observed number of events in the  $k^{th}$  group over time,  $E_k$  = expected number of events in  
393 the  $k^{th}$  group over time and  $V = \sum Var (O_k - E_k) = \sum V_k$ .

### 394 **Standardized pooled within-cluster sum of squares**

395 Here we calculate the pooled within-cluster sum of squares and standardize it by the total sum of squares  
396 similar to methodology used in the gap statistic<sup>34</sup> to select the appropriate number of clusters.

397 Suppose that the final labels have clustered the data into  $k$  clusters  $C_1, C_2, \dots, C_k$ , with  $C_r$  denoting the  
398 indices of observations in cluster  $r$ , and  $n_r = |C_r|$ . Let

$$w_r = \sum_{\substack{i, j \in C_r \\ i > j}} I_{w_{ij}},$$

399 where  $w_r$  is the sum of all pairwise distances in cluster  $r$ ,  $\{ij\}$  represents a pair of samples belonging to a  
400 cluster  $C_r$  and  $I_w$  is calculated from Eq 4. Then the standardized pooled within-cluster sum of squares is  
401 calculated as:

402

$$W_s = \sum_{r=1}^k w_r / \sum_{\substack{i \\ i>j}} \sum_j I_{wij} .$$

403  
404 Here  $W_s$  decreases monotonically as the number of clusters  $k$  increases. The optimal number of clusters  
405 is where  $W_s$  is minimized and creates an ‘elbow’ or a point of inflection, where addition of more clusters  
406 does not improve cluster separation. Another property of  $W_s$  is that it can be used to compare amongst  
407 different datasets as it lies between 0 and 1 after standardization. This is useful in comparing *survClust*  
408 runs between individual data types and when we integrate them.

#### 409 410 **Simulation**

411 Continuing from the simulation study presented in **Fig 1**, we go into detail about cross-validation and how  
412 to chose  $k$  for a *survClust* run. In **Fig 1**, the input matrix was subjected to 50 rounds of 3-fold cross-  
413 validation (2/3 training and 1/3 test. The *survClust* fit for a cluster  $k$  based on training data from each fold  
414 was used to predict cluster membership for the remaining 1/3 test data. Final sample labels were  
415 aggregated over all folds and cluster meaning was preserved across folds via centroid relabeling. (**See**  
416 **Supplementary Note 1.3**).

417  
418 Logrank test statistic and standardized pooled within-cluster sum of squares was calculated for the  
419 consolidated test labels over 3-folds for each round. **Supplementary Fig 1(c)** summarizes these metrics  
420 for 50 rounds of cross validation for  $k=2-7$ . We see that logrank is maximized for  $k=3$ , and the  
421 standardized pooled within-cluster sum of squares elbows at  $k=3$ , pointing to the optimal selection of  $k$  at  
422  $k=3$ . The final class labels are assigned by consolidating solutions across all folds in all rounds of cross  
423 validations.

424  
425 **Implementation and availability.** *survClust* is freely available as an R package at  
426 (<https://github.com/arorarshi/survClust>).

427 For k-means clustering, we used the k-means implementation in the R base package. For  
428 multidimensional scaling, we used the *cmdscale* function in base R. The weighted distance metric for

429 binary data was programmed in C++ with R extension using *Rcpp* package, which is computationally fast.  
430 Hazard ratios were derived from the cox proportional hazard model came from the R *survival* package.  
431 Kaplan Meier curves were plotted using *ggsurvplot* in package *survminer*. Beeswarm plots were made  
432 using R package *beeswarm*. Mutation data along with relevant clinical annotations were plotted using  
433 *panelmap* (<https://github.com/arorarshi/panelmap>). The *circlize* R package was used to make pan-  
434 cancer plots and the code used to plot these is available in a function called *circomap*  
435 <https://github.com/arorarshi/panelmap#example---circomap>)

436

437 Below is the workflow of proposed *survClust* method:

- 438 1. **getDist** – Compute a weighted distance matrix across given  $m$  data types. Standardization and  
439 accounting for non-overlapping samples is also accomplished in this step.
- 440 2. **combineDist** – Integrate  $m$  data types by averaging over  $m$  weighted distance matrices.
- 441 3. **survClust** and **cv.survclust** – Estimate the *survClust* solution for a given cluster number  $k$  based  
442 on the weighted and integrated distance matrix. Optimal  $k$  is estimated via cross-validation. Use  
443 the chosen  $k$  and the cross-validated results to arrive at final class labels. Cross-validated results  
444 are assessed over the following performance metrics – the logrank statistic, standardized pooled  
445 within-cluster sum of squares and cluster solutions with class size less than 5 samples.

446

## 447 **DECLARATIONS**

### 448 **Availability of Data and materials**

449 The *survClust* algorithm's software implementation is available at <https://github.com/arorarshi/survClust>.  
450 Simulated dataset and simulated survival dataset are also available on GitHub. All genomics and clinical  
451 data was downloaded from <https://portal.gdc.cancer.gov/>. *panelmap* and *circomap* are available at  
452 <https://github.com/arorarshi/panelmap>

453

### 454 **Funding**

455 CA008748.

456

457 **Author's contributions**

458 A.A. A.B.O., V.E.S. and R.S. designed the research. A.A. made software implementations and analyzed  
459 the data. A.A. A.B.O., V.E.S. and R.S. wrote the paper.

460

461 **Acknowledgements**

462 The research was supported by the National Cancer Institute, Award CA008748.

463

464 **Authors' information**

465 *Department of Epidemiology and Biostatistics, Memorial Sloan Kettering Cancer Center, New York, NY*

466 Arshi Arora, Venkatraman E. Seshan, Ronglai Shen

467

468 *Department of Epidemiology and Biostatistics, University of California at San Francisco, CA*

469 *Hellen Diller Family Comprehensive Cancer Center, University of California at San Francisco, CA*

470 Adam B. Olshen

471

472 **Corresponding authors**

473 Correspondence to Ronglai Shen (shenr@mskcc.org)

474

475 **REFERENCES**

476

477 1 Shen, R. L., Olshen, A. B. & Ladanyi, M. Integrative clustering of multiple genomic data types  
478 using a joint latent variable model with application to breast and lung cancer subtype analysis.  
479 *Bioinformatics* **25**, 2906-2912, doi:10.1093/bioinformatics/btp543 (2009).

480 2 Mo, Q. *et al.* Pattern discovery and cancer gene identification in integrated cancer genomic data.  
481 *Proc Natl Acad Sci U S A* **110**, 4245-4250, doi:10.1073/pnas.1208949110 (2013).

- 482 3 Vaske, C. J. *et al.* Inference of patient-specific pathway activities from multi-dimensional cancer  
483 genomics data using PARADIGM. *Bioinformatics* **26**, i237-i245,  
484 doi:10.1093/bioinformatics/btq182 (2010).
- 485 4 Hoadley, K. A. *et al.* Multiplatform Analysis of 12 Cancer Types Reveals Molecular Classification  
486 within and across Tissues of Origin. *Cell* **158**, 929-944, doi:10.1016/j.cell.2014.06.049 (2014).
- 487 5 Wang, B. *et al.* Similarity network fusion for aggregating data types on a genomic scale. *Nat*  
488 *Methods* **11**, 333-337, doi:10.1038/nmeth.2810 (2014).
- 489 6 Ramazzotti, D., Lal, A., Wang, B., Batzoglou, S. & Sidow, A. Multi-omic tumor data reveal  
490 diversity of molecular mechanisms that correlate with survival. *Nature Communications* **9**, 4453,  
491 doi:ARTN 4453 10.1038/s41467-018-06921-8 (2018).
- 492 7 Xing, E. P., Jordan, M. I., Russell, S. J. & Ng, A. Y. in *Advances in neural information processing*  
493 *systems*. 521-528.
- 494 8 Hoadley, K. A. *et al.* Cell-of-Origin Patterns Dominate the Molecular Classification of 10,000  
495 Tumors from 33 Types of Cancer. *Cell* **173**, 291-304 e296, doi:10.1016/j.cell.2018.03.022 (2018).
- 496 9 Thorsson, V. *et al.* The Immune Landscape of Cancer. *Immunity* **48**, 812-830 e814,  
497 doi:10.1016/j.immuni.2018.03.023 (2018).
- 498 10 Malta, T. M. *et al.* Machine Learning Identifies Stemness Features Associated with Oncogenic  
499 Dedifferentiation. *Cell* **173**, 338-354 e315, doi:10.1016/j.cell.2018.03.034 (2018).
- 500 11 Sanchez-Vega, F. *et al.* Oncogenic Signaling Pathways in The Cancer Genome Atlas. *Cell* **173**, 321-  
501 337 e310, doi:10.1016/j.cell.2018.03.035 (2018).
- 502 12 Novembre, J. *et al.* Genes mirror geography within Europe. *Nature* **456**, 98-U95,  
503 doi:10.1038/nature07331 (2008).
- 504 13 Network, C. G. A. R. Comprehensive, integrative genomic analysis of diffuse lower-grade  
505 gliomas. *New England Journal of Medicine* **372**, 2481-2498 (2015).

- 506 14 Yan, H. *et al.* IDH1 and IDH2 mutations in gliomas. *N Engl J Med* **360**, 765-773,  
507 doi:10.1056/NEJMoa0808710 (2009).
- 508 15 Network, C. G. A. R. Comprehensive molecular characterization of papillary renal-cell carcinoma.  
509 *New England Journal of Medicine* **374**, 135-145 (2016).
- 510 16 Alexandrov, L. B. *et al.* Signatures of mutational processes in human cancer. **500**, 415 (2013).
- 511 17 Zhou, Q. *et al.* Worldwide research trends on aristolochic acids (1957–2017): Suggestions for  
512 researchers. **14**, e0216135 (2019).
- 513 18 Getz, G. *et al.* Integrated genomic characterization of endometrial carcinoma. *Nature* **497**, 67-  
514 73, doi:10.1038/nature12113 (2013).
- 515 19 Newman, A. M. *et al.* Robust enumeration of cell subsets from tissue expression profiles. *Nat*  
516 *Methods* **12**, 453-457, doi:10.1038/nmeth.3337 (2015).
- 517 20 Chae, Y. K. *et al.* Mutations in DNA repair genes are associated with increased neo-antigen load  
518 and activated T cell infiltration in lung adenocarcinoma. *Oncotarget* **9**, 7949-7960,  
519 doi:10.18632/oncotarget.23742 (2018).
- 520 21 Olshen, A. B., Venkatraman, E. S., Lucito, R. & Wigler, M. Circular binary segmentation for the  
521 analysis of array-based DNA copy number data. *Biostatistics* **5**, 557-572,  
522 doi:10.1093/biostatistics/kxh008 (2004).
- 523 22 Bellacosa, A. *et al.* Molecular Alterations of the Akt2 Oncogene in Ovarian and Breast  
524 Carcinomas. *International Journal of Cancer* **64**, 280-285, doi:DOI 10.1002/ijc.2910640412  
525 (1995).
- 526 23 Sheffer, M. *et al.* Association of survival and disease progression with chromosomal instability: a  
527 genomic exploration of colorectal cancer. *Proc Natl Acad Sci U S A* **106**, 7131-7136,  
528 doi:10.1073/pnas.0902232106 (2009).



- 529 24 Cummins, J. M. *et al.* The colorectal microRNAome. *Proc Natl Acad Sci U S A* **103**, 3687-3692,  
530 doi:10.1073/pnas.0511155103 (2006).
- 531 25 Ally, A. *et al.* Comprehensive and integrative genomic characterization of hepatocellular  
532 carcinoma. **169**, 1327-1341. e1323 (2017).
- 533 26 Zehir, A. *et al.* Mutational landscape of metastatic cancer revealed from prospective clinical  
534 sequencing of 10,000 patients. **23**, 703 (2017).
- 535 27 Micheel, C. M. *et al.* American association for cancer research project genomics evidence  
536 neoplasia information exchange: from inception to first data release and beyond—lessons  
537 learned and member institutions' perspectives. **2**, 1-14 (2018).
- 538 28 Torgerson, W. S. Theory and methods of scaling. (1958).
- 539 29 Hartigan, J. A. & Wong, M. A. Algorithm AS 136: A k-means clustering algorithm. *J Journal of the*  
540 *Royal Statistical Society. Series C* **28**, 100-108 (1979).
- 541 30 Mardia, K. V. & Methods. Some properties of classical multi-dimensional scaling. *J Communications*  
542 *in Statistics-Theory* **7**, 1233-1241 (1978).
- 543 31 Legendre, P. & Gallagher, E. D. Ecologically meaningful transformations for ordination of species  
544 data. *Oecologia* **129**, 271-280, doi:10.1007/s004420100716 (2001).
- 545 32 Martin, N. & Maes, H. *Multivariate analysis*. (Academic press London, 1979).
- 546 33 Harrington, D. P. & Fleming, T. R. A Class of Rank Test Procedures for Censored Survival-Data.  
547 *Biometrika* **69**, 553-566, doi:DOI 10.1093/biomet/69.3.553 (1982).
- 548 34 Tibshirani, R., Walther, G. & Hastie, T. Estimating the number of clusters in a data set via the gap  
549 statistic. *Journal of the Royal Statistical Society Series B-Statistical Methodology* **63**, 411-423,  
550 doi:Doi 10.1111/1467-9868.00293 (2001).

551

**a Simulated data type**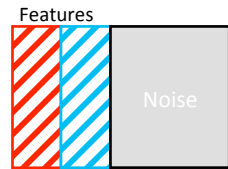**b Unsupervised clustering solution**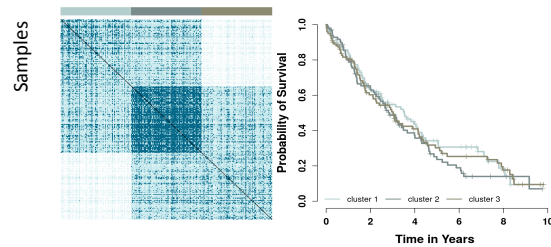**c SurvClust solution**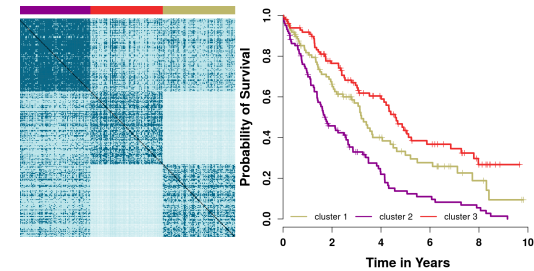**d survClust Workflow**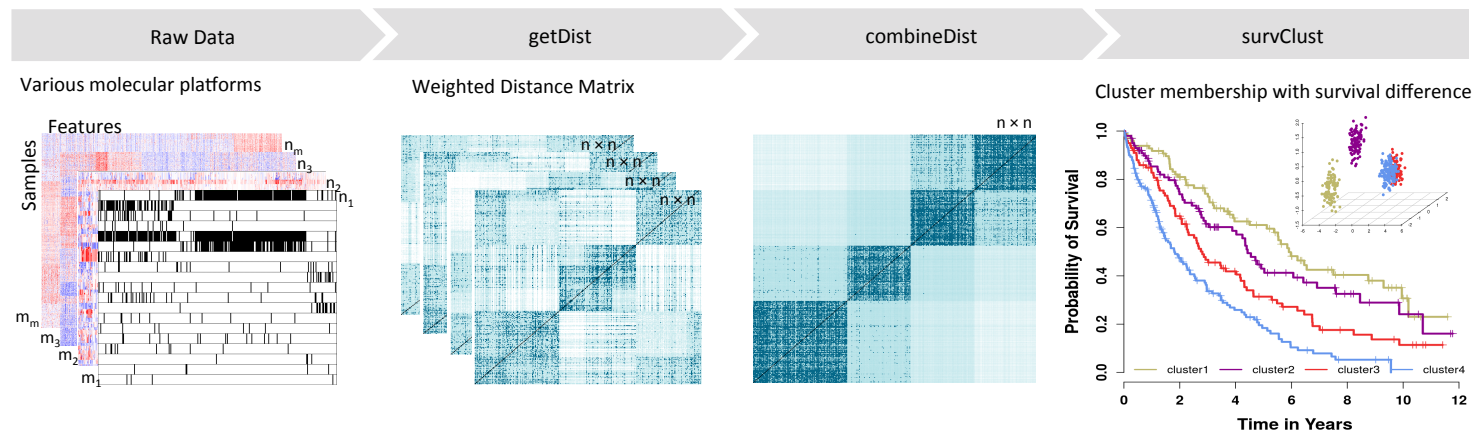**Figure 1: Overview of *survClust*.**

- A simulated data example, consisting of features that define 3 patient subtypes without direct association with survival (shaded in red), features that define 3 patient subtypes with distinct survival outcome (shaded in blue), and random features generated from Gaussian noise (grey).
- Euclidean distance matrix demonstrating patient-level pairwise similarity, with darker blue shade representative of higher similarity. Color panels above the distance matrix show the three class solution obtained by unsupervised algorithm via k-means and the concordance between the simulated 3 survival subtypes (the truth). Kaplan Meier curves for the 3 unsupervised subtypes show no distinction in survival outcome.
- survClust* employs a patient outcome weighted distance matrix to identify the desired subtypes with distinct Kaplan Meier curves.
- survClust* allows integrative analysis of multiple data modalities to identify survival-associated molecular subtypes.

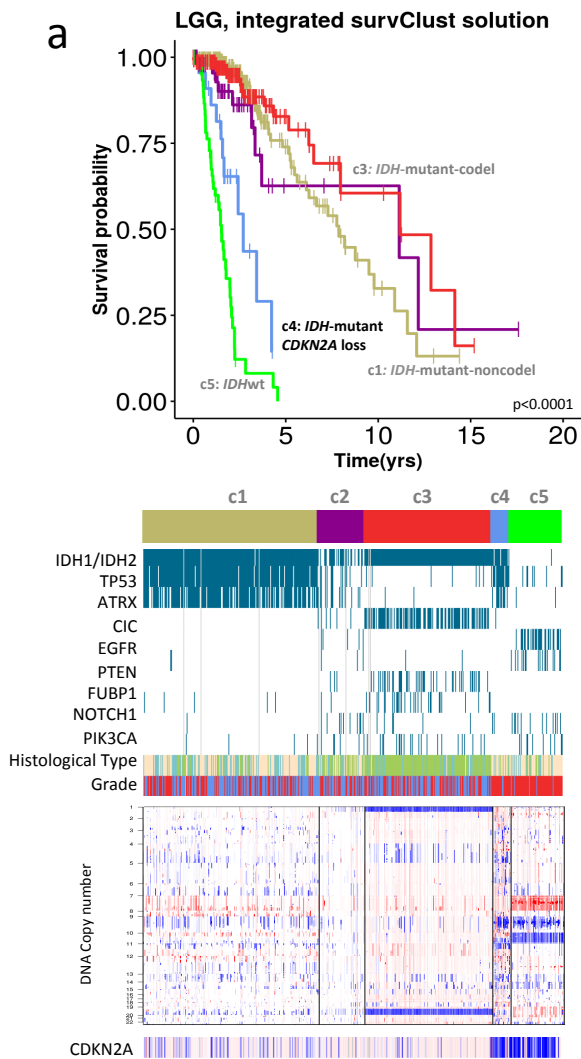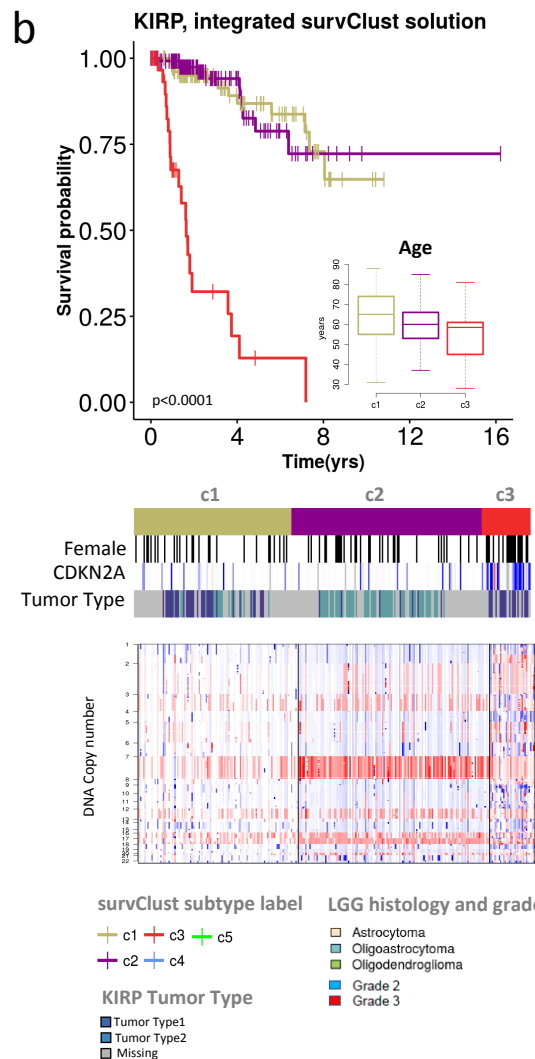

**Figure 2: Outcome-weighted integrative clustering of low grade glioma and kidney papillary cell carcinoma using *survClust*.**

(a) *survClust* identifies an *IDH*-mutant *CDKN2A*-loss subtype similar to *IDH*-wt tumors in terms of aggressive clinical behavior. Top: Kaplan-Meier curves of the integrated *survClust* subtypes of LGG. Middle: *Panelmap* summarizing major association of mutational and clinical features of the integrated LGG subtypes. Bottom: Copy number profile for each of the integrated subtypes.

(b) *survClust* identifies prognostic kidney papillary renal cell carcinoma (KIRP) subtypes.

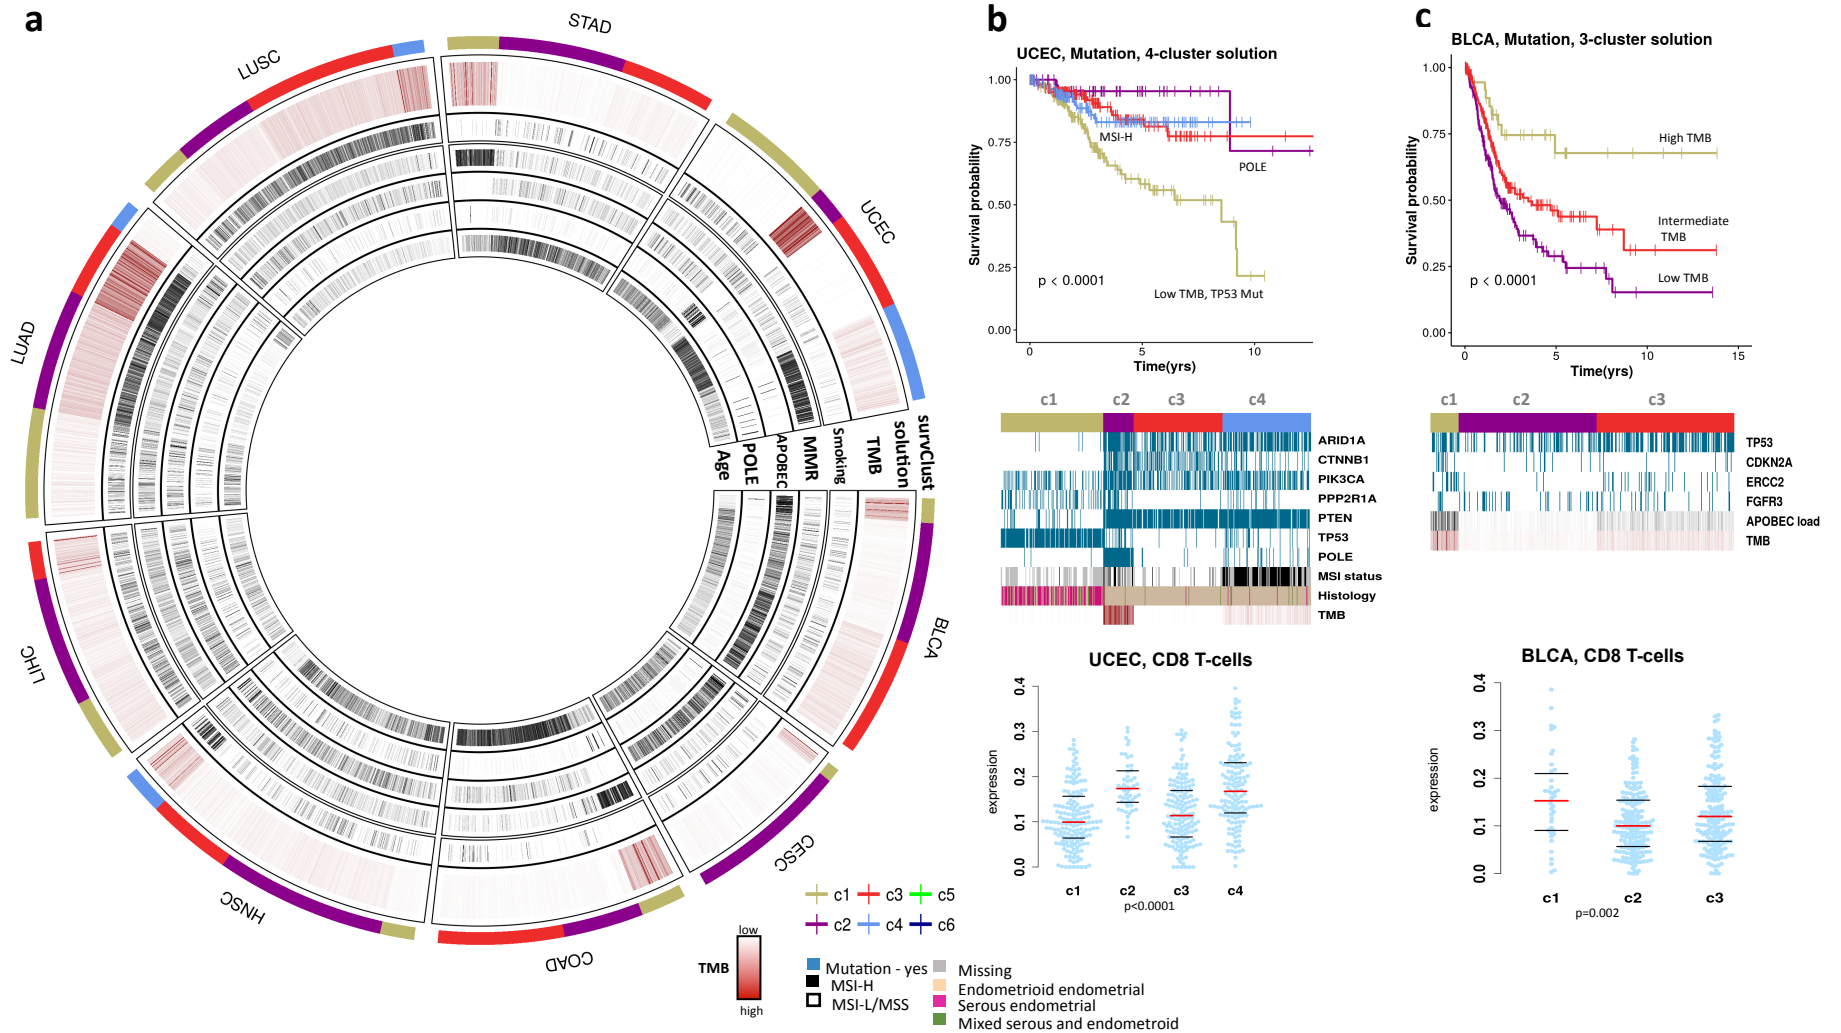

**Figure 3: *survClust* identifies mutational subtypes associated with survival across cancer types.**

- (a) *Circomap* showing total mutation burden (TMB) in brown color and mutational signatures (smoking, MMR, APOBEC, POLE and aging) in tumors across bladder (BLCA), cervical (CESC), colon (COAD), head and neck (HNSC), liver (LIHC), lung adenocarcinoma (LUAD), lung Squamous Cell (LUSC), stomach (STAD), and endometrial (UCEC) cancers. Outer circle indicates mutation-based *survClust* membership.
- (b) *survClust* mutation subtypes in endometrial cancer. From top to bottom: Kaplan-Meier curves for the 4 mutation subtypes, *panelmap* depicting significantly mutated genes, MSI status, Histology and TMB associated with the subtypes, and beeswarm plot showing CD8 T-cell marker expression (y-axis) across the 4 subtype (x-axis). Red line depicts the median, and top and bottom black bars represent the 25<sup>th</sup> and 75<sup>th</sup> percentile respectively.
- (c) *survClust* mutation subtypes in bladder cancer. From top to bottom: Kaplan-Meier curves for the 3 mutation subtypes, *panelmap* depicting significantly mutated genes, Papillary histology (yes – black, no-white), APOBEC load and TMB associated with the 3 subtypes, and beeswarm plot showing CD8 T-cell expression (y-axis) across the 3 subtypes (x-axis).

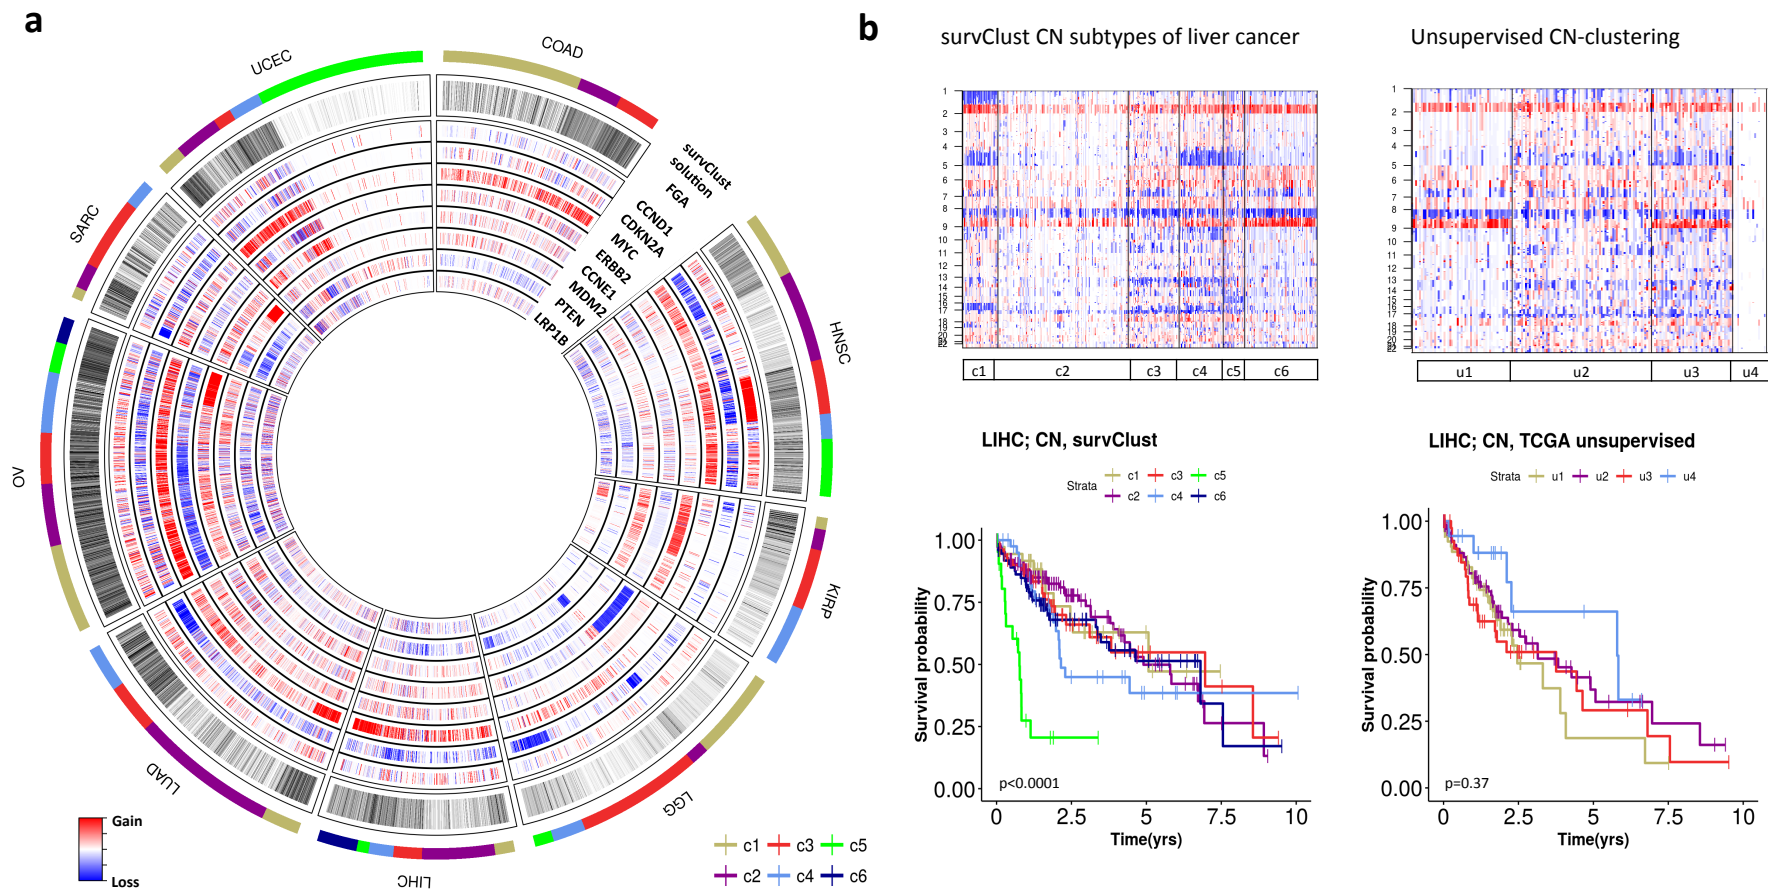

**Figure 4: *survClust* identifies copy number patterns associated with patient survival outcome across various cancer types**  
 (a) *Circomap* showing fraction genome altered (FGA) and gene level copy number alterations in each tumor across colorectal (COAD), head and neck (HNSC,) kidney renal papillary cell carcinoma (KIRP), low grade glioma (LGG), liver (LIHC), lung adenocarcinoma (LUAD), ovarian (OV), soft-tissue sarcoma (SARC) and endometrial (UCEC) cancers. Outer circle indicates the *survClust* membership.  
 (b) *survClust* is more powerful than unsupervised clustering in identifying survival-associated copy number subtypes in liver cancer.



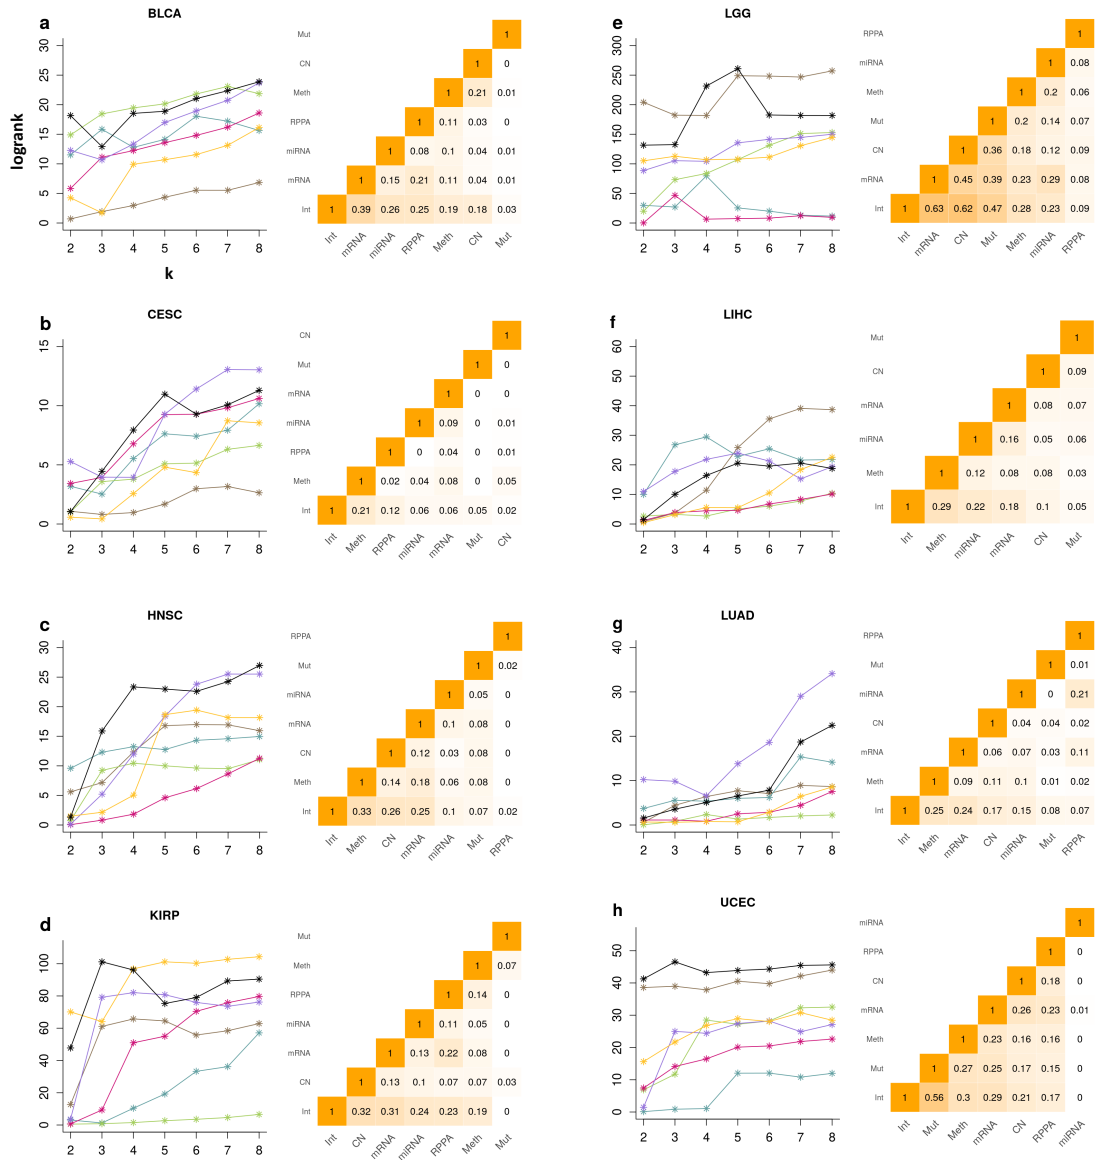

**Figure 5: Integration of multiple data types enhances the identification of survival distinct subgroups**  
**a-h:** Each panel has two plots: the plot on the left summarizes median cross validated log rank statistic across k=2 to 8 (number of clusters). Each line is a data type (see legend), and the black line represents the *survClust* run on integrating all 6 platforms. Plot on the right summarizes the adjusted rand index between cross validated *survClust* solutions of individual data types and the integration of all. In this comparison, the *survClust* solution was chosen for an appropriate k which maximized logrank statistic and minimized the standardized pooled within sum of squares.

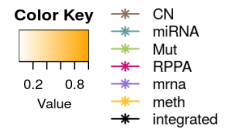

Source: https://www.biorxiv.org/content/10.1101/2020.05.11.084798v1.full.pdf
